## CORRECTION

# Correction: INO80 requires a polycomb subunit to regulate the establishment of poised chromatin in murine spermatocytes

Prabuddha Chakraborty and Terry Magnuson

There was an error in Development (2022) **149**, dev200089 (doi:10.1242/dev.200089).

The images of the P18 testes in supplementary material Fig. S2A were missing in the published PDF (see below). The journal apologises to the authors and readers for this error, which occurred during production of the PDF. The online supplementary material has now been corrected.

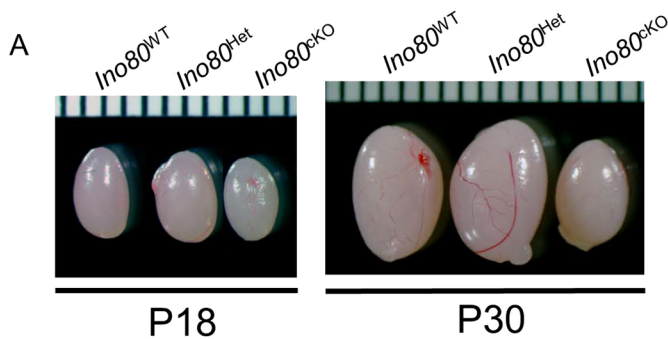

**Fig. S2 (corrected panel A). *Ino80* deletion in the prepubertal testis.** (A) Image exhibiting the size of whole testis dissected from *Ino80*<sup>WT</sup>, *Ino80*<sup>Het</sup> and *Ino80*<sup>cko</sup> mice on P18 and P30.

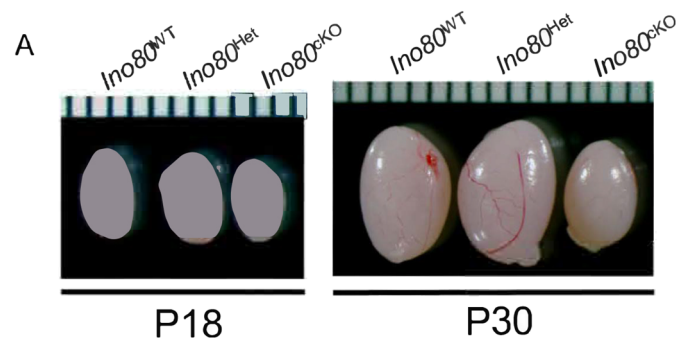

**Fig. S2 (original panel A). *Ino80* deletion in the prepubertal testis.** (A) Image exhibiting the size of whole testis dissected from *Ino80*<sup>WT</sup>, *Ino80*<sup>Het</sup> and *Ino80*<sup>cko</sup> mice on P18 and P30.
